# Supplementary material for: SERS hotspot engineering using external field assembly of a plasmonic magnetic nanocomposite with high sensitivity and uniformity
Source: Royal Society of Chemistry journal article supplement (doi:10.1039/d4ta02854f), 2024-01-01
Supplement: d4ta02854f1.pdf [file d4ta02854f1.pdf]

SERS Hotspot Engineering Using External Field Assembly of Plasmonic Magnetic Nanocomposite with High Sensitive and Uniformity Zhenli Sun<sup>a</sup>, Ning Wang<sup>a</sup>, Yiyan Zhang<sup>a</sup>, Xunlong Ji<sup>a</sup>, Zijin Hong<sup>a</sup>, Dan Xie<sup>a</sup>, Wentao Zhang<sup>a</sup>, Wenjing Liu<sup>b</sup>, Jingjing Du<sup>c,d\*</sup>

<sup>a</sup> MOE Key Laboratory of Resources and Environmental System Optimization, College of Environmental Science and Engineering, North China Electric Power University, Beijing 102206, China

<sup>b</sup> Key Laboratory for Environmental Factors Control of Agro-product Quality Safety, Ministry of Agriculture and Rural Affairs, Agro-Environmental Protection Institute, Ministry of Agriculture and Rural Affairs, Tianjin 300191, China

<sup>c</sup> State Key Laboratory of Environmental Chemistry and Ecotoxicology, Research Center for Eco-Environmental Sciences, Chinese Academy of Sciences, Beijing 100085, China

<sup>d</sup> University of Chinese Academy of Sciences, Beijing, China

#### 4-MPY Density calculations:

##### 1 Calculation of hot spot density

① There are 30 mg Fe<sub>3</sub>O<sub>4</sub>@SiO<sub>2</sub> (FS) nanoparticle in 3 mL water, the number of FS was

$$N_{FS} = \frac{m_{FS}}{M_{FS}} = \frac{30 \times 10^{-3}}{2.2 \times \frac{4\pi}{3} ((153 \times 10^{-7})^3 - (150 \times 10^{-7})^3) + 5.18 \times \frac{4\pi}{3} (150 \times 10^{-7})^3}$$
$$= 4.0 \times 10^{11}$$

② Take 0.5 mL of FS substrate, remove the supernatant, and add 0.25 mL of de-ionized water, the amount of FS

$$N_{FS'} = \frac{0.5}{3.0} \times N_{FS} = \frac{0.5}{3.0} \times 4.0 \times 10^{11} = 6.7 \times 10^{10}$$

③ The number of 4 μL substrate nanoparticle used for SERS detection was

$$N_{FS0} = 6.67 \times 10^{10} \times \frac{4 \times 10^{-3}}{3} = 8.9 \times 10^7$$

④ The distribution area of FA particles was 8.66 mm<sup>2</sup> (Figure S 2a) before enrichment of the substrate with the magnet and 1.34 mm<sup>2</sup> (Figure S 2g) in the

presence of the magnet, respectively, and thus the density of FA particles before and after enrichment was

$$\text{Before enrichment: } D_{FS1} = \frac{8.9 \times 10^7}{8.66} = 1.0 \times 10^7 \text{ per } mm^2$$

$$\text{After enrichment: } D_{FS2} = \frac{8.9 \times 10^7}{1.34} = 6.6 \times 10^7 \text{ per } mm^2$$

⑤ Calculation of FA particle gap before and after enrichment (gap)

$$\text{Before enrichment: } G_{FA1} = \frac{1}{\sqrt{1.0 \times 10^7}} = 0.31 \mu m$$

$$\text{After enrichment: } G_{FA2} = \frac{1}{\sqrt{6.6 \times 10^7}} = 0.12 \mu m$$

⑥ Calculation of density of hot spots before and after enrichment (density of hot spots,  $D_{HS}$ )

Before enrichment:

$$D_{HS1} = 2 \times \sqrt{1.0 \times 10^7} \times (\sqrt{1.0 \times 10^7} + 1) = 2.1 \times 10^7 \text{ per } mm^2$$

After enrichment:

$$D_{HS2} = 2 \times \sqrt{6.6 \times 10^7} \times (\sqrt{6.6 \times 10^7} + 1) = 1.3 \times 10^8 \text{ per } mm^2$$

2 Calculation of Density calculation for FA surface 4MPY

① Based on the results of the SERS detection (Figure S 1), the amount of 4MPY adsorbed on the 4  $\mu$ L FA substrate was

$$N_{AM} = C_{4MPY} \times V_{4MPY} = (10.0 - 0.15) \times 10^{-6} \times 1 \times 10^{-3} \times 6.02 \times 10^{23} = 5.93 \times 10^{15}$$

② The number of 4MPY on each FA particle is:

$$N_{4MPY0} = \frac{5.93 \times 10^{15}}{8.9 \times 10^7} = 6.7 \times 10^7$$

③ Before and after enrichment, the density of AM distribution was (density of AM,  $D_{AM}$ )

Before enrichment:

$$D_{4MPY1} = 6.7 \times 10^7 \times 1.0 \times 10^7 = 6.9 \times 10^{14} \text{ per } mm^2$$

After enrichment:

$$D_{4MPY2} = 6.7 \times 10^7 \times 6.6 \times 10^7 = 4.5 \times 10^{15} \text{ per } mm^2$$

④ Per FA surface, 4 MPY density distribution was

Based on previously studies, the spacing of gold nanoparticles on the FA surface is 7 nm, so the number of gold nanoparticles per FA surface was

$$N_{Au} = \frac{4\pi \times \left(R + r + \frac{space}{2}\right)^2}{\pi \times \left(r + \frac{space}{2}\right)^2} = \frac{4\pi \times \left(155 + 10 + \frac{7}{2}\right)^2}{\pi \times \left(10 + \frac{7}{2}\right)^2} = 587$$

The surface area of per FA particle was

$$S_{FA} = S_{FA} + S_{Au} \times N_{Au} = 4\pi R^2 + 4\pi r^2 \times 587 = 4\pi 155^2 + 4\pi 10^2 \times 587 = 1.08 \times 10^6$$

The density distribution of 4MPY on the FA surface was

$$D_{AM3} = \frac{N_{4MPY0}}{S_{FA}} = \frac{6.7 \times 10^7}{1.08 \times 10^6} = 62 \text{ per } nm^2$$

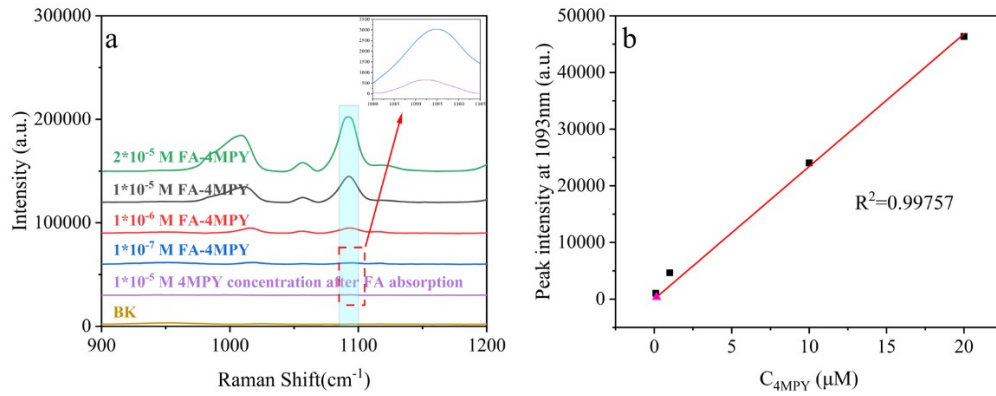

Figure S 1 (a)Signal intensity plots of Raman spectra of 4MPY at different dilutions (b) The calibration curve of 4MPY (the inserted red-purple point was 4MPY concentration after FA absorption.).

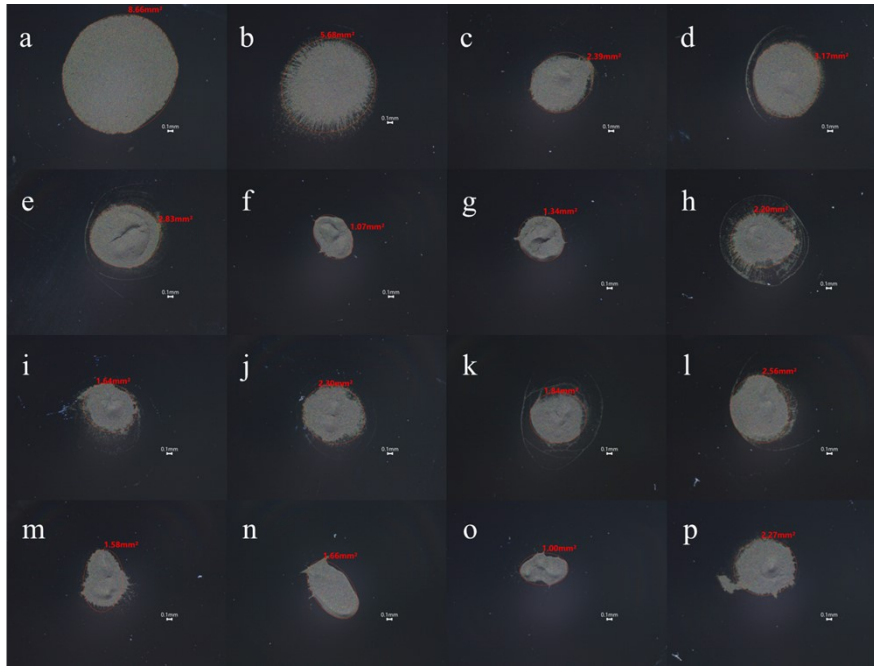

Figure S 2 White light map of magnetic FA particle distribution after enrichment with different magnets.

Table S 1 Effect of different magnet sizes on the substrate

| Sample | Magnetic fields (mT) | Diameter of magnet (mm) | Thickness of magnet (mm) | Area (mm <sup>2</sup> ) | GAP (μm) | density of hot spots (per mm <sup>2</sup> ) | density of AM (per mm <sup>2</sup> ) |
|--------|----------------------|-------------------------|--------------------------|-------------------------|----------|---------------------------------------------|--------------------------------------|
| a      | 0                    | 0                       | 0                        | 8.66                    | 0.31     | 2.1E+07                                     | 6.9E+14                              |
| b      | 22                   | 1                       | 1                        | 5.68                    | 0.25     | 3.1E+07                                     | 1.0E+15                              |
| c      | 26                   | 1                       | 2                        | 2.39                    | 0.16     | 7.4E+07                                     | 2.5E+15                              |
| d      | 67                   | 2                       | 1                        | 3.17                    | 0.19     | 5.6E+07                                     | 1.9E+15                              |
| e      | 87                   | 2                       | 2                        | 2.83                    | 0.18     | 6.3E+07                                     | 2.1E+15                              |
| f      | 96                   | 3                       | 1                        | 1.07                    | 0.11     | 1.7E+08                                     | 5.6E+15                              |
| g      | 103                  | 3                       | 2                        | 1.34                    | 0.12     | 1.3E+08                                     | 4.5E+15                              |
| h      | 126                  | 3                       | 3                        | 2.20                    | 0.16     | 8.1E+07                                     | 2.7E+15                              |
| i      | 138                  | 3                       | 4                        | 1.64                    | 0.14     | 1.1E+08                                     | 3.6E+15                              |
| j      | 143                  | 3                       | 5                        | 2.30                    | 0.16     | 7.7E+07                                     | 2.6E+15                              |
| k      | 144                  | 3                       | 6                        | 1.84                    | 0.14     | 9.7E+07                                     | 3.2E+15                              |
| l      | 113                  | 4                       | 1                        | 2.56                    | 0.17     | 7.0E+07                                     | 2.3E+15                              |
| m      | 170                  | 4                       | 2                        | 1.58                    | 0.13     | 1.1E+08                                     | 3.8E+15                              |
| n      | 102                  | 5                       | 1                        | 1.66                    | 0.14     | 1.1E+08                                     | 3.6E+15                              |
| o      | 187                  | 5                       | 2                        | 1.00                    | 0.11     | 1.8E+08                                     | 6.0E+15                              |
| p      | 185                  | 7                       | 2                        | 2.27                    | 0.16     | 7.8E+07                                     | 2.6E+15                              |
